# Supplementary material
Source: PubMed Central journal article supplement (PMC1402256)

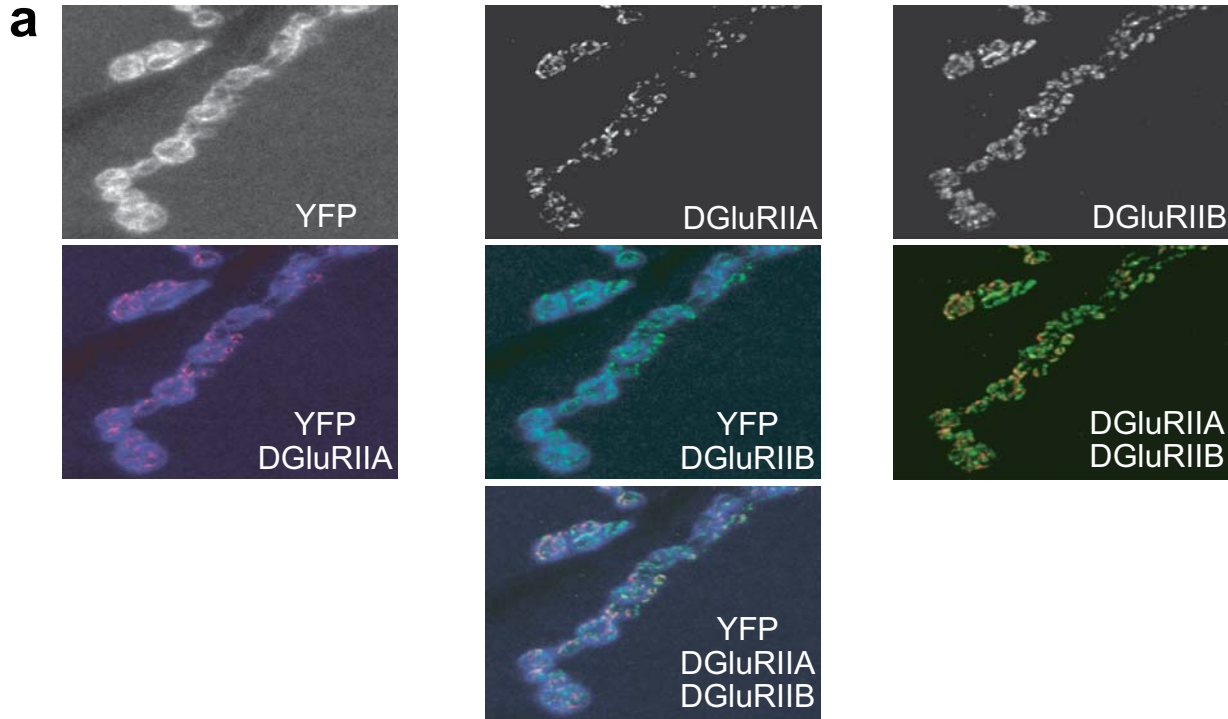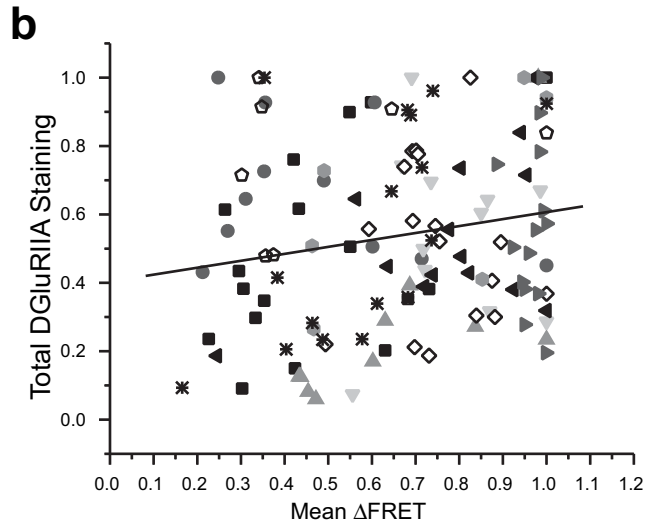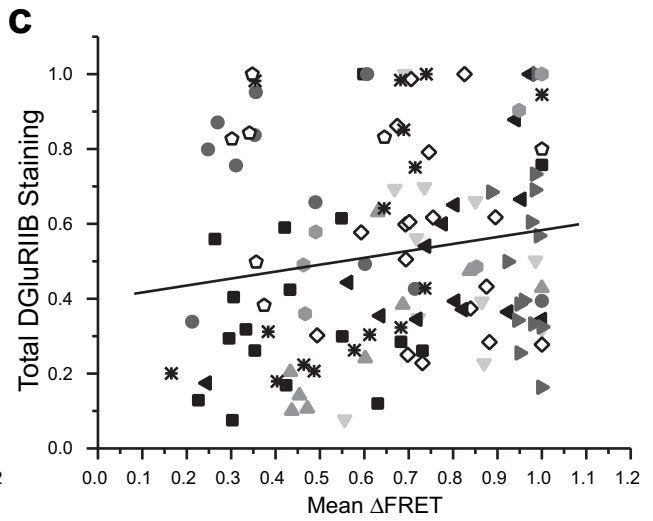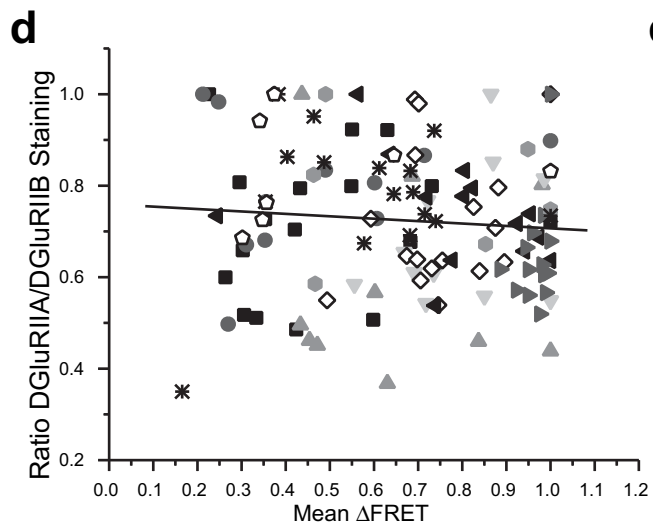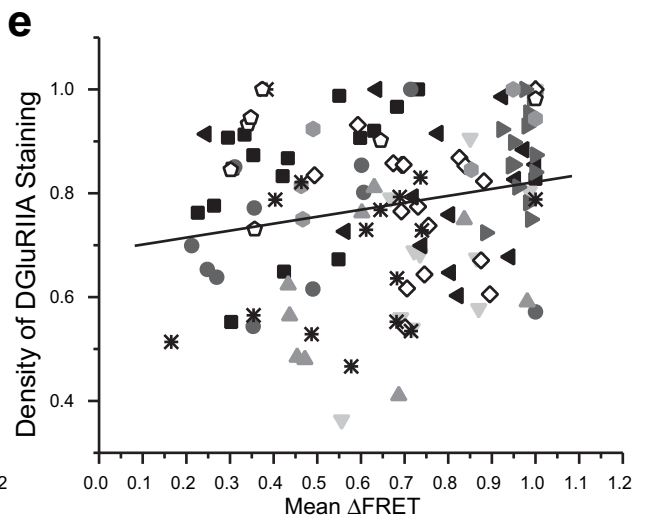

Supplement: NIHMS5170-supplement-sup_4.pdf [file NIHMS5170-supplement-sup_4.pdf]

Supplementary Figure-3 (Isacoff)

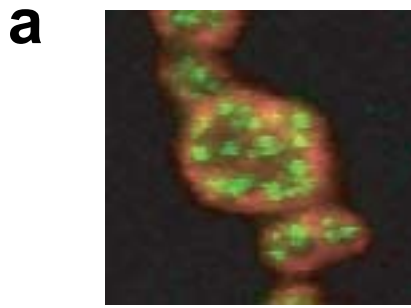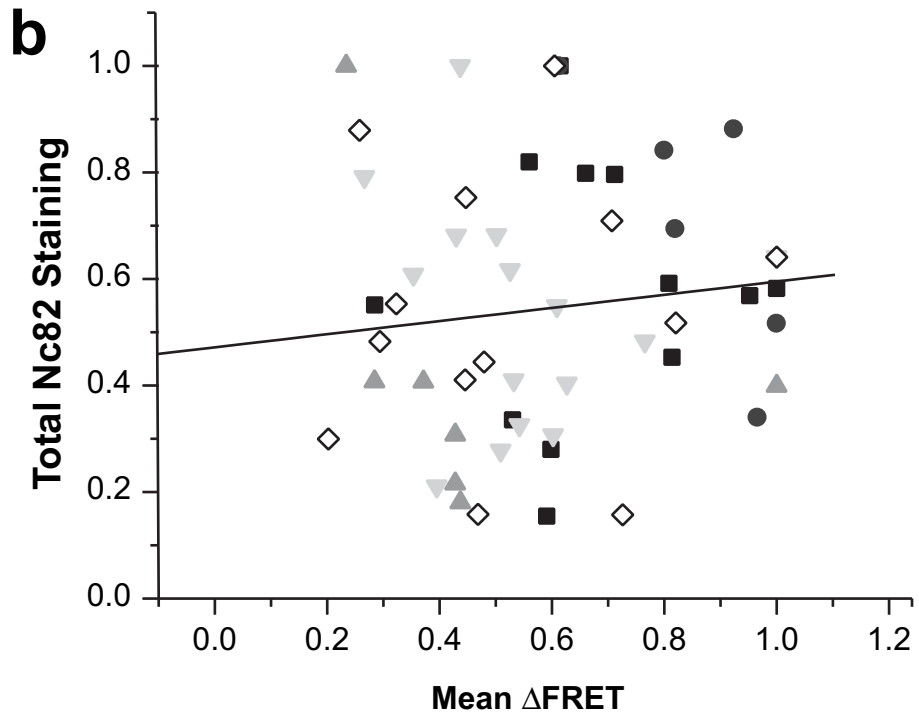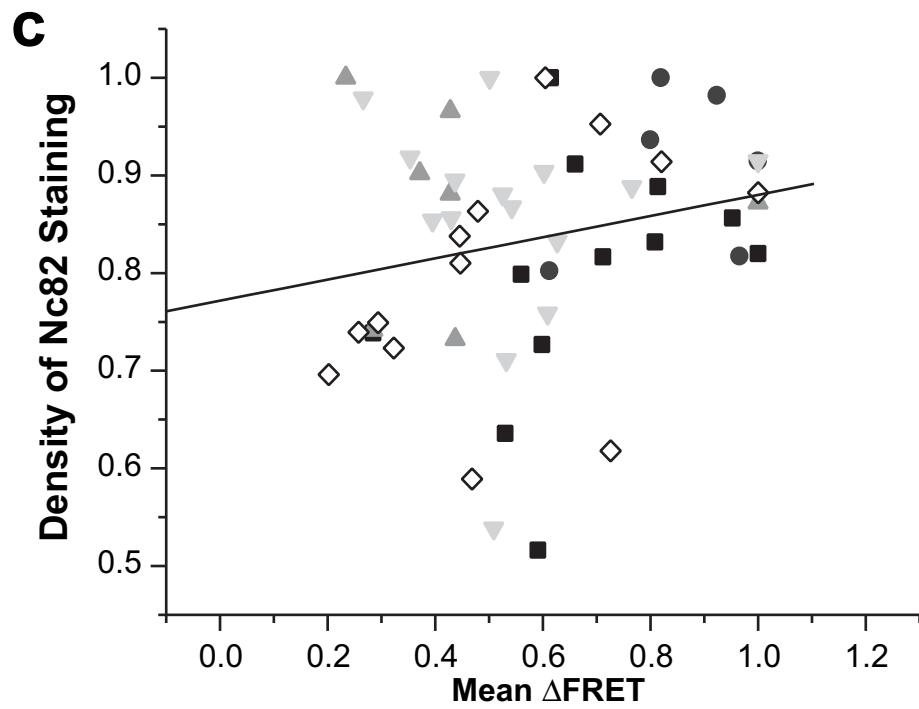

Supplement: NIHMS5170-supplement-sup_5.pdf [file NIHMS5170-supplement-sup_5.pdf]

Supplementary Figure-4 (Isacoff)

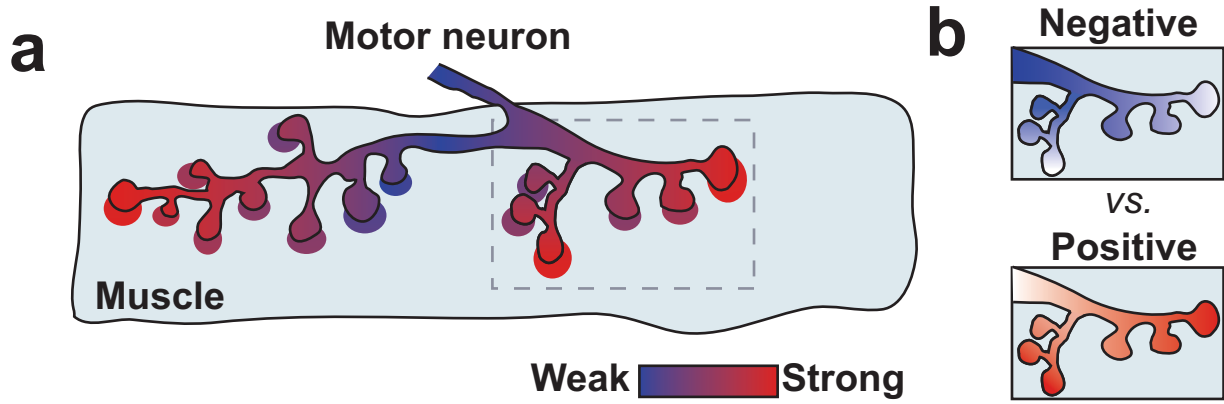

Supplement: NIHMS5170-supplement-sup_6.pdf [file NIHMS5170-supplement-sup_6.pdf]

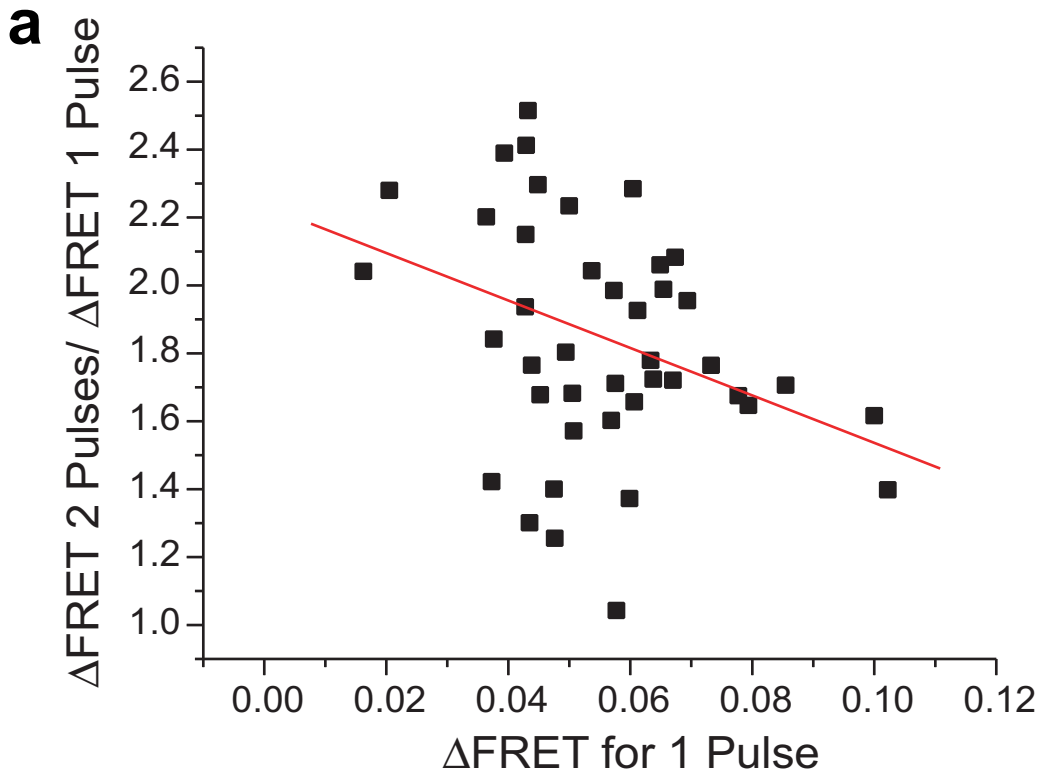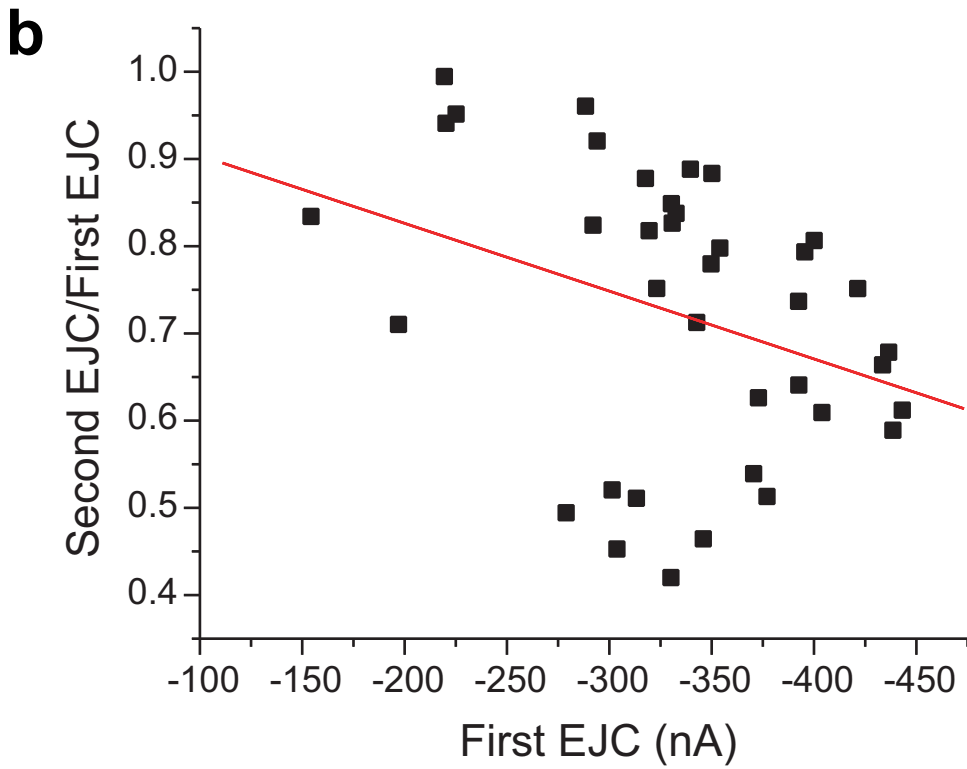

Supplement: NIHMS5170-supplement-sup__3.pdf [file NIHMS5170-supplement-sup__3.pdf]
